# Supplementary material
Source: PubMed Central journal article supplement (PMC8274545)
Supplement: NIHMS1696868-supplement-1.pdf [file NIHMS1696868-supplement-1.pdf]

# Supplementary data

## Table of Contents

|                                                                                                                                                                                                                                                                                               |    |
|-----------------------------------------------------------------------------------------------------------------------------------------------------------------------------------------------------------------------------------------------------------------------------------------------|----|
| <i>Supplemental Table 1: Characteristics of homozygous (A/A) or heterozygous rs2642438 carriers (G/A) compared with non-carriers (G/G) that underwent liver MRI, related to Table 1....</i>                                                                                                   | 2  |
| <i>Supplemental Table 2: Characteristics of African American participants in PMBB, comparing homozygous or heterozygous carriers of rs2642438 with non-carriers, related to Table 3. ....</i>                                                                                                 | 3  |
| <i>Supplemental Table 3: Characteristics of Black British participants in UKB, comparing homozygous or heterozygous carriers of rs2642438 with non-carriers, related to Table 1. ....</i>                                                                                                     | 4  |
| <i>Supplemental Table 4: Characteristics of homozygous (A/A) or heterozygous rs2642438 carriers (G/A) compared with non-carriers (G/G) that underwent cardiac MRI, related to Table 1. ....</i>                                                                                               | 5  |
| <i>Supplemental Table 5: Characteristics of homozygous (A/A) or heterozygous rs2642438 carriers (G/A) compared with non-carriers (G/G) that underwent carotid ultrasound, related to Table 1. ....</i>                                                                                        | 5  |
| <i>Supplemental Table 6: Total death and selected causes of death in PMBB until June 2020, related to Table 3. ....</i>                                                                                                                                                                       | 6  |
| <i>Supplemental Table 7: Cox regression models for liver death and cardiovascular death per MTARC1 rs2642438 allele, related to Figure 3. ....</i>                                                                                                                                            | 6  |
| <i>Supplemental Table 8: Characteristics of heterozygous MTARC1 p.Arg200Ter carriers compared with rs2642438 non-carriers in PMBB, related to Table 3. ....</i>                                                                                                                               | 7  |
| <i>Supplemental Table 9: Characteristics of heterozygous MTARC1 p.Arg200Ter carriers compared with rs2642438 non-carriers in UKB, related to Table 1. ....</i>                                                                                                                                | 8  |
| <i>Supplemental Figure 1: Barograph comparing A) the NAFLD percentage and B) elevated ALT serum levels in participants MTARC1 rs2642438 homozygotes(A/A), heterozygotes(G/A) and non-carriers (G/G) with and without several important risk factors in the UKB, related to Figure 2. ....</i> | 10 |
| <i>Supplemental Figure 2: Prospective liver-related mortality as a function of MTARC1 rs2642438 genotype in PMBB, related to Figure 3. ....</i>                                                                                                                                               | 11 |
| <i>Supplemental Figure 3: Prospective liver-related mortality as a function of MTARC1 rs2642438 genotype in Black British participants in the UKB, related to Figure 3. ....</i>                                                                                                              | 12 |
| <i>Supplemental Figure 4: Overall and cardiovascular mortality in participants stratified by MTARC1 rs264238 genotype in UKB (A,B) and PMBB (C,D), related to Figure 3. ....</i>                                                                                                              | 13 |

**Supplemental Table 1: Characteristics of homozygous (A/A) or heterozygous rs2642438 carriers (G/A) compared with non-carriers (G/G) that underwent liver MRI, related to Table 1.**

|                                   | <b>Non carriers (G/G)</b><br><i>n=2 492</i> | <b>Heterozygotes (G/A)</b><br><i>n=2 088</i> | <b>Homozygotes (A/A)</b><br><i>n=455</i> | <b>p-Value G/G vs G/A</b> | <b>p-Value G/G vs A/A</b> |
|-----------------------------------|---------------------------------------------|----------------------------------------------|------------------------------------------|---------------------------|---------------------------|
| <b>Baseline Characteristics</b>   |                                             |                                              |                                          | <u>Univ.</u>              | <u>Univ.</u>              |
| Age (years)                       | 55.7±7.5                                    | 55.5±7.6                                     | 55.6±7.5                                 | .32                       | .63                       |
| Women (%)                         | 53                                          | 53                                           | 50                                       | .92                       | .19                       |
| BMI (kg/m <sup>2</sup> )          | 26.6±4.1                                    | 26.8±4.0                                     | 26.5±4.1                                 | .30                       | .53                       |
| Diabetes mellitus (%)             | 3                                           | 2                                            | 2                                        | <b>.019</b>               | .051                      |
|                                   |                                             |                                              |                                          |                           |                           |
| <b>MRI of the liver</b>           |                                             |                                              |                                          | <u>Multiv.</u>            | <u>Multiv.</u>            |
| Proton density fat fraction (%)   | 4.1±4.8                                     | 3.8±4.4                                      | 3.6±4.0                                  | <b>.013</b>               | .049                      |
| Liver Iron (msec)                 | 1.34±0.31                                   | 1.35±0.38                                    | 1.35±0.43                                | .95                       | .70                       |
| Liver inflammation factor (units) | 0.9±0.3                                     | 0.9±0.3                                      | 0.9±0.4                                  | .55                       | .38                       |

Quantitative measures are expressed as means and standard deviations or as relative frequencies (%). All multivariable analyses were adjusted for age, sex, BMI and principal components of ancestry 1-4. A FDR adjusted significance level of  $p \leq 0.03$  was used.

**Supplemental Table 2: Characteristics of African American participants in PMBB, comparing homozygous or heterozygous carriers of rs2642438 with non-carriers, related to Table 3.**

|                                                         | Non carriers (G/G)<br>n=6433 | Heterozygotes (G/A)<br>n=1 252 | Homozygotes (A/A)<br>n=70 | p-Value G/G vs G/A      | p-Value G/G vs A/A      |
|---------------------------------------------------------|------------------------------|--------------------------------|---------------------------|-------------------------|-------------------------|
| <b>Characteristics</b>                                  |                              |                                |                           | <i>Univ.</i>            | <i>Univ.</i>            |
| Age (years)                                             | 55.6±17.3                    | 55.5±13.9                      | 56.9±15.4                 | .90                     | .50                     |
| Women (%)                                               | 65                           | 64                             | 59                        | .80                     | .32                     |
| BMI (kg/m <sup>2</sup> )                                | 32.5±8.2                     | 32.5±6.1                       | 31.4±7.9                  | .90                     | .24                     |
| Diabetes mellitus (%)                                   | 27                           | 29                             | 31                        | .35                     | .47                     |
| Ethnicity (% African American)                          | 100                          | 100                            | 100                       |                         |                         |
|                                                         |                              |                                |                           |                         |                         |
| <b>Liver status</b>                                     |                              |                                |                           | <i>Multiv.</i>          | <i>Multiv.</i>          |
| ALT (U/l)                                               | 22.0±30.1                    | 21.0±17.2                      | 21.5±12.8                 | .26                     | .82                     |
| ALT ≥ULN                                                | 6                            | 6                              | 3                         | .38                     | .43                     |
| AST (U/l)                                               | 24±47                        | 22.0±15.7                      | 22±10                     | .22                     | .80                     |
| AST ≥ULN                                                | 6                            | 4                              | 3                         | .25                     | .46                     |
| GGT (U/l)                                               | 130±200                      | 103±166                        | 109±210                   | .25                     | .22                     |
| GGT (%ULN)                                              | 52                           | 42                             | 40                        | .051                    | .59                     |
|                                                         |                              |                                |                           |                         |                         |
| <b>Lipid metabolism</b>                                 |                              |                                |                           |                         |                         |
| Triglycerides (mg/dl)                                   | 107±52                       | 112±69                         | 109±50                    | <b>.029</b>             | .71                     |
| HDL cholesterol (mg/dl)                                 | 51±15                        | 50±14                          | 49±16                     | .17                     | .15                     |
| LDL cholesterol (mg/dl)                                 | 103±33                       | 100±32                         | 92±34                     | .041                    | <b>.009</b>             |
| Cholesterol (mg/dl)                                     | 176±39                       | 173±39                         | 160±38                    | <b>.022</b>             | <b>.001</b>             |
|                                                         |                              |                                |                           |                         |                         |
| <b>ICD10 coded diagnoses</b>                            |                              |                                |                           |                         |                         |
| Toxic liver disease (K71)                               | 0.6                          | 0.1                            | 0.0                       | .38                     | .99                     |
| Hepatic failure (K72)                                   | 1.0                          | 0.7                            | 1.0                       | .34                     | .36                     |
| Chronic Hepatitis (K73)                                 | 0.2                          | 0.1                            | 0.0                       | .91                     | .99                     |
| Fibrosis and cirrhosis (K74)                            | 0.4                          | 0.1                            | 0.2                       | .099                    | .15                     |
| Inflammatory liver diseases (K75)                       | 2.2                          | 1.1                            | 1.4                       | <b>.011<sup>a</sup></b> | .64                     |
| NASH (K75.8)                                            | 2.2                          | 1.6                            | 1.8                       | .10                     | <b>.027<sup>b</sup></b> |
| Other liver diseases (K76)                              | 4.4                          | 3.4                            | 2.9                       | .082                    | .052                    |
| NAFLD (K76.0)                                           | 3.3                          | 2.2                            | 2.6                       | <b>.027<sup>c</sup></b> | .16                     |
| HCC (C22.0)                                             | 3.2                          | 2.7                            | 0.0                       | .28                     | .99                     |
|                                                         |                              |                                |                           |                         |                         |
| <b>Frequency of well-known NAFLD influencing genes*</b> |                              |                                |                           |                         |                         |
| HSD17B13 rs72621367:TA                                  | 0.14±0.36                    | 0.20±0.44                      | 0.20±0.44                 | .064                    | .15                     |
| PNPLA3 rs738409:G                                       | 0.28±0.60                    | 0.41±0.58                      | 0.41±0.58                 | .044                    | .049                    |

Quantitative measures are expressed as means and standard deviations or as relative frequencies (%). All multivariable analyses were adjusted for age, sex, BMI and principal components of ancestry 1-4. A FDR adjusted significance level of  $p \leq 0.03$  was used. <sup>a</sup>aOR=0.57[0.38-0.79], <sup>b</sup>aOR=0.70[0.50-0.98], <sup>c</sup>aOR=0.75[0.59-0.96]. \*0=non carrier, 1=heterozygous, 2=homozygous.

**Supplemental Table 3: Characteristics of Black British participants in UKB, comparing homozygous or heterozygous carriers of rs2642438 with non-carriers, related to Table 1.**

|                                                         | Non carriers (G/G)<br>n=6 665 | Heterozygotes (G/A)<br>n=857 | Homozygotes (A/A)<br>n=37 | p-Value G/G vs G/A | p-Value G/G vs A/A |
|---------------------------------------------------------|-------------------------------|------------------------------|---------------------------|--------------------|--------------------|
| <b>Characteristics</b>                                  |                               |                              |                           | <u>Univ.</u>       | <u>Univ.</u>       |
| Age (years)                                             | 51.8±8                        | 52±7.9                       | 53.2±8.8                  | .90                | .50                |
| Women (%)                                               | 57                            | 63                           | 60                        | .80                | .32                |
| BMI (kg/m <sup>2</sup> )                                | 29.5±5.3                      | 29.4±5.5                     | 28.8±4.9                  | .90                | .24                |
| Diabetes mellitus (%)                                   | 11                            | 11                           | 13                        | .35                | .47                |
| Ethnicity (% Black)                                     | 100                           | 100                          | 100                       |                    |                    |
|                                                         |                               |                              |                           |                    |                    |
| <b>Liver status</b>                                     |                               |                              |                           | <u>Multiv.</u>     | <u>Multiv.</u>     |
| ALT (U/l)                                               | 22.2±13.7                     | 21.1±10.4                    | 22.2±19.0                 | .079               | .67                |
| ALT ≥ULN                                                | 5                             | 4                            | 3                         | .67                | .095               |
| AST (U/l)                                               | 27.2±13.6                     | 26.0±8.2                     | 26.8±16.5                 | .17                | .91                |
| AST ≥ULN                                                | 5                             | 4                            | 6                         | .27                | .53                |
| GGT (U/l)                                               | 41.9±39.7                     | 39.9±34.4                    | 35.5±22.2                 | .65                | .39                |
| GGT (%ULN)                                              | 23                            | 23                           | 16                        | .93                | .17                |
|                                                         |                               |                              |                           |                    |                    |
| <b>Lipid metabolism</b>                                 |                               |                              |                           |                    |                    |
| Triglycerides (mg/dl)                                   | 1.20±0.7                      | 1.29±0.8                     | 1.32±0.88                 | .11                | .18                |
| HDL cholesterol (mg/dl)                                 | 1.43±0.3                      | 1.43±0.3                     | 1.40±0.49                 | .81                | .090               |
| LDL cholesterol (mg/dl)                                 | 3.26±0.8                      | 3.20±0.8                     | 3.22±0.95                 | <b>.005</b>        | .78                |
| Cholesterol (mg/dl)                                     | 5.23±1                        | 5.18±1                       | 5.20±1.3                  | <b>.013</b>        | .13                |
|                                                         |                               |                              |                           |                    |                    |
| <b>ICD10 coded diagnoses</b>                            |                               |                              |                           |                    |                    |
| Toxic liver disease (K71)                               | 0.06                          | 0.0                          | 0.0                       | .99                | .99                |
| Hepatic failure (K72)                                   | 0.11                          | 0.10                         | 0.0                       | .64                | .99                |
| Chronic Hepatitis (K73)                                 | 0.12                          | 0.0                          | 0.0                       | .99                | .99                |
| Fibrosis and cirrhosis (K74)                            | 0.14                          | 0.08                         | 0.2                       | .13                | .99                |
| Inflammatory liver diseases (K75)                       | 0.19                          | 0.05                         | 0.0                       | .11                | .99                |
| NASH (K75.8)                                            | 0.13                          | 0.02                         | 0.0                       | .32                | .99                |
| Other liver diseases (K76)                              | 1.02                          | 0.70                         | 0.0                       | .51                | .99                |
| NAFLD (K76.0)                                           | 0.85                          | 0.42                         | 0.0                       | .31                | .99                |
| HCC (C22.0)                                             | 0.02                          | 0.00                         | 0.0                       | .99                | .99                |
|                                                         |                               |                              |                           |                    |                    |
| <b>Frequency of well-known NAFLD influencing genes*</b> |                               |                              |                           |                    |                    |
| HSD17B13 rs72621367:TA                                  | 0.12±0.36                     | 0.12±0.44                    | 0.18±0.44                 | .80                | .58                |
| PNPLA3 rs738409:G                                       | 0.24±0.60                     | 0.26±0.58                    | 0.26±0.58                 | .92                | .35                |

Quantitative measures are expressed as means and standard deviations or as relative frequencies (%). All multivariable analyses were adjusted for age, sex, BMI and principal components of ancestry 1-4. \*0=non carrier, 1=heterozygous, 2=homozygous. A FDR adjusted significance level of  $p \leq 0.03$  was used.

**Supplemental Table 4: Characteristics of homozygous (A/A) or heterozygous rs2642438 carriers (G/A) compared with non-carriers (G/G) that underwent cardiac MRI, related to Table 1.**

|                                 | Non carriers<br><i>n</i> =2 234 | Heterozygotes<br><i>n</i> =1 867 | Homozygotes<br><i>n</i> =401 | p-Value<br>G/G vs<br>G/A | p-Value<br>G/G vs<br>A/A |
|---------------------------------|---------------------------------|----------------------------------|------------------------------|--------------------------|--------------------------|
| <b>Baseline Characteristics</b> |                                 |                                  |                              | <u>Univ.</u>             | <u>Univ.</u>             |
| Age (years)                     | 55.6±7.5                        | 55.3±7.6                         | 55.3±7.5                     | .24                      | .50                      |
| Women (%)                       | 54                              | 55                               | 51                           | .93                      | .18                      |
| BMI (kg/m <sup>2</sup> )        | 26.3±4.1                        | 26.5±4.0                         | 26.2±4.1                     | .064                     | .58                      |
| Diabetes mellitus (%)           | 3                               | 2                                | 1                            | .10                      | .035                     |
|                                 |                                 |                                  |                              | <i>Multiv.</i>           | <i>Multiv.</i>           |
| <b>Cardiac ultrasound</b>       |                                 |                                  |                              |                          |                          |
| LV ejection fraction (%)        | 55.8±6.8                        | 55.9±7.2                         | 55.7±7.3                     | .99                      | .67                      |
| Cardiac output (l/min)          | 4.7±1.1                         | 4.8±1.2                          | 4.9±1.8                      | <b>.016</b>              | .033                     |

Quantitative measures are expressed as means and standard deviations or as relative frequencies (%). All multivariable analyses were adjusted for age, sex, BMI and principal components of ancestry 1-4. A FDR adjusted significance level of  $p \leq 0.03$  was used.

**Supplemental Table 5: Characteristics of homozygous (A/A) or heterozygous rs2642438 carriers (G/A) compared with non-carriers (G/G) that underwent carotid ultrasound, related to Table 1.**

|                                         | Non carriers<br><i>n</i> =12 189 | Heterozygotes<br><i>n</i> =10 081 | Homozygotes<br><i>n</i> =2 092 | p-Value<br>G/G vs<br>G/A | p-Value<br>G/G vs<br>A/A |
|-----------------------------------------|----------------------------------|-----------------------------------|--------------------------------|--------------------------|--------------------------|
| <b>Baseline Characteristics</b>         |                                  |                                   |                                | <u>Univ.</u>             | <u>Univ.</u>             |
| Age (years)                             | 55.0±7.5                         | 55.1±7.5                          | 55.3±7.4                       | .50                      | .42                      |
| Women (%)                               | 52                               | 52                                | 51                             | .64                      | .36                      |
| BMI (kg/m <sup>2</sup> )                | 26.6±4.2                         | 26.6±4.2                          | 26.5±4.2                       | .29                      | .59                      |
| Diabetes mellitus (%)                   | 3                                | 3                                 | 2                              | .74                      | .52                      |
|                                         |                                  |                                   |                                | <i>Multiv.</i>           | <i>Multiv.</i>           |
| <b>Mean Intima-Media Thickness (µm)</b> |                                  |                                   |                                |                          |                          |
| 120°                                    | 676±143                          | 678±144                           | 678±144                        | .39                      | .73                      |
| 150°                                    | 669±141                          | 673±140                           | 671±141                        | .18                      | .77                      |
| 210°                                    | 686±153                          | 689±153                           | 686±156                        | .27                      | .79                      |
| 240°                                    | 686±143                          | 689±144                           | 688±158                        | .27                      | .78                      |

Quantitative measures are expressed as means and standard deviations or as relative frequencies (%). All multivariable analyses were adjusted for age, sex, BMI and principal components of ancestry 1-4. A FDR adjusted significance level of  $p \leq 0.03$  was used.

**Supplemental Table 6: Total death and selected causes of death in PMBB until June 2020, related to Table 3.**

| Cause of death (ICD 10)    | PMBB        |
|----------------------------|-------------|
| Malignancies (C)           | 1392        |
| Cardiovascular (I)         | 1529        |
| Respiratory (J)            | 436         |
| liver related (K7 and C22) | 69          |
| <i>Total death</i>         | <i>4170</i> |

**Supplemental Table 7: Cox regression models for liver death and cardiovascular death per *MTARC1* rs2642438 allele, related to Figure 3.**

|                                                                                                       | Risk of liver death           |                   | Risk of cardiovascular death  |                   |
|-------------------------------------------------------------------------------------------------------|-------------------------------|-------------------|-------------------------------|-------------------|
|                                                                                                       | Hazard ratio (HR)<br>[95% CI] | <i>P</i><br>value | Hazard ratio (HR)<br>[95% CI] | <i>P</i><br>value |
| <b>Unadjusted</b>                                                                                     | 0.82 [0.74-0.92]              | <.0001            | 1.04 [0.97-1.08]              | .10               |
| <b>Adjusted for age, sex and PC1-4</b>                                                                | 0.82 [0.73-0.91]              | <.0001            | 1.03 [0.98-1.08]              | .12               |
| <b>Adjusted for age, sex, BMI and PC1-4</b>                                                           | 0.82 [0.73-0.91]              | <.0001            | 1.04 [0.98-1.08]              | .11               |
| <b>Adjusted for DM, smoking, age, sex and PC1-4</b>                                                   | 0.82 [0.73-0.91]              | <.0001            | 1.04 [0.97-1.08]              | .12               |
| <b>Adjusted for BMI, age, sex, alcohol consumption, waist circumference, DM, LDL levels and PC1-4</b> | 0.79 [0.70-0.88]              | <.0001            | 1.03 [0.98-1.08]              | .15               |
| <b>Adjusted for all above</b>                                                                         | 0.79 [0.71-0.88]              | .0001             | 1.04 [0.98-1.08]              | .12               |

**Supplemental Table 8: Characteristics of heterozygous *MTARC1* p.Arg200Ter carriers compared with rs2642438 non-carriers in PMBB, related to Table 3.**

|                                                         | Non carriers<br>(G/G)<br><i>n</i> =9 548 | Heterozygotes of<br>pLOF variants<br><i>n</i> =10 | p-Value<br>(uni-variate) | p-Value<br>(multi-<br>variate) |
|---------------------------------------------------------|------------------------------------------|---------------------------------------------------|--------------------------|--------------------------------|
| <b>Characteristics</b>                                  |                                          |                                                   |                          |                                |
| Age (years)                                             | 60.6±17.3                                | 63.7±16.2                                         | .23                      |                                |
| Women (%)                                               | 57                                       | 50                                                | .25                      |                                |
| BMI (kg/m <sup>2</sup> )                                | 29.0±5.9                                 | 30.4±7.3                                          | .40                      |                                |
| Diabetes mellitus (%)                                   | 26                                       | 20                                                | .19                      |                                |
| Ethnicity (% Whites)                                    | 33                                       | 50                                                | <b>.001</b>              |                                |
| <b>Liver status</b>                                     |                                          |                                                   |                          |                                |
| ALT (U/l)                                               | 24.4±36.1                                | 23.1±17.6                                         | .091                     | .19                            |
| ALT ≥ULN (%)                                            | 7                                        | 0                                                 | <b>.027</b>              | .99                            |
| AST (U/l)                                               | 25.3±44.8                                | 22.0±15.1                                         | .072                     | <b>.007</b>                    |
| AST ≥ULN (%)                                            | 6                                        | 0                                                 | .055                     | .99                            |
| GGT (U/l)                                               | 130±202                                  | 103.5±126.6                                       | .097                     | .77                            |
| GGT ≥ULN (%)                                            | 53                                       | 50                                                | .51                      | .96                            |
| <b>Lipid metabolism</b>                                 |                                          |                                                   |                          |                                |
| Triglycerides (mg/dl)                                   | 112±78                                   | 158±80                                            | <b>.001</b>              | <b>.004</b>                    |
| HDL cholesterol (mg/dl)                                 | 50±15                                    | 46±12                                             | .15                      | .29                            |
| LDL cholesterol (mg/dl)                                 | 100±33                                   | 84±23                                             | .037                     | .13                            |
| Cholesterol (mg/dl)                                     | 174±39                                   | 165±31                                            | .035                     | .40                            |
| <b>ICD10 coded diagnoses</b>                            |                                          |                                                   |                          |                                |
| Toxic liver disease (K71)                               | 0.7                                      | 0.0                                               | .59                      | .99                            |
| Hepatic failure (K72)                                   | 1.0                                      | 0.0                                               | .51                      | .99                            |
| Chronic Hepatitis (K73)                                 | 0.7                                      | 0.0                                               | .59                      | .99                            |
| Fibrosis and cirrhosis (K74)                            | 0.4                                      | 0.0                                               | .85                      | .99                            |
| Inflammatory liver diseases (K75)                       | 2.2                                      | 0.0                                               | .24                      | .99                            |
| NASH (K75.8)                                            | 2.2                                      | 0.0                                               | .24                      | .99                            |
| Other liver diseases (K76)                              | 4.0                                      | 0.0                                               | .081                     | .99                            |
| NAFLD (K76.0)                                           | 3.0                                      | 0.0                                               | .12                      | .99                            |
| HCC (C22.0)                                             | 2.4                                      | 0.0                                               | .28                      | .99                            |
| <b>Frequency of well-known NAFLD influencing genes*</b> |                                          |                                                   |                          |                                |
| HSD17B13 <i>rs72621367:TA</i>                           | 0.55±0.63                                | 0.50±0.63                                         | .51                      | .97                            |
| PNPLA3 <i>rs738409:G</i>                                | 0.35±0.58                                | 0.40±0.58                                         | .47                      | .55                            |

Quantitative measures are expressed as means and standard deviations or as relative frequencies (%). All multivariable analyses were adjusted for age, sex, BMI, and PC1-4. \*(0=non carrier, 1=heterozygous, 2=homozygous). A FDR adjusted significance level of  $p \leq 0.03$  was used.

**Supplemental Table 9: Characteristics of heterozygous *MTARC1* p.Arg200Ter carriers compared with rs2642438 non-carriers in UKB, related to Table 1.**

|                                                         | Non carriers<br>(G/G)<br><i>n</i> =227 602 | Heterozygotes<br>of <i>MTARC1</i><br>p.R200Ter<br><i>n</i> =83 | p-<br>Value<br>(uni-<br>variate) | p-<br>Value<br>(multi-<br>variate) |
|---------------------------------------------------------|--------------------------------------------|----------------------------------------------------------------|----------------------------------|------------------------------------|
| <b>Characteristics</b>                                  |                                            |                                                                |                                  |                                    |
| Age (years)                                             | 56.6±8.1                                   | 57.0±7.3                                                       | .71                              |                                    |
| Women (%)                                               | 55                                         | 56                                                             | .78                              |                                    |
| BMI (kg/m <sup>2</sup> )                                | 27.4±4.8                                   | 27.3±4.3                                                       | .89                              |                                    |
| Alcohol (g/d)                                           | 8.9±10.1                                   | 8.4±11.9                                                       | .10                              |                                    |
| Diabetes mellitus (%)                                   | 5                                          | 11                                                             | .59                              |                                    |
| Ethnicity (% white)                                     | 100                                        | 100                                                            |                                  |                                    |
| <b>Frequency of well-known NAFLD influencing genes*</b> |                                            |                                                                |                                  |                                    |
| HSD17B13 <i>rs72621367:TA</i>                           | 0.55±0.63                                  | 0.55±0.63                                                      | .53                              | .58                                |
| PNPLA3 <i>rs738409:G</i>                                | 0.43±0.58                                  | 0.43±0.58                                                      | .74                              | .76                                |
| <b>Survival</b>                                         |                                            |                                                                |                                  |                                    |
| All-cause mortality (%)                                 | 6                                          | 2                                                              | .20                              | .18                                |
| Liver related death (%)                                 | 0.21                                       | 0                                                              | .73                              | .99                                |
| Cardiovascular death (%)                                | 1.2                                        | 1.2                                                            | .32                              | .35                                |
| <b>Liver status</b>                                     |                                            |                                                                |                                  |                                    |
| ALT (U/l)                                               | 23.7±14.5                                  | 21.7±13.5                                                      | .19                              | .25                                |
| ALT ≥ULN (%)                                            | 7.2                                        | 3.8                                                            | .15                              | .28                                |
| AST (U/l)                                               | 26.2±10.8                                  | 25.4±7.9                                                       | .39                              | .54                                |
| AST ≥ULN (%)                                            | 4.8                                        | 4.6                                                            | .89                              | .92                                |
| GGT (U/l)                                               | 37.1±41.9                                  | 27.8±16.9                                                      | <b>.017</b>                      | .054                               |
| GGT ≥ULN (%)                                            | 17.1                                       | 11.4                                                           | .12                              | .20                                |
| <b>Lipid metabolism</b>                                 |                                            |                                                                |                                  |                                    |
| Triglycerides (mg/dl)                                   | 154±89                                     | 156±91                                                         | .93                              | .81                                |
| HDL cholesterol (mg/dl)                                 | 57±15                                      | 53±12                                                          | .13                              | <b>.022</b>                        |
| LDL cholesterol (mg/dl)                                 | 138±34                                     | 133±35                                                         | .18                              | .22                                |
| Cholesterol (mg/dl)                                     | 221±44                                     | 215±44                                                         | .31                              | .15                                |
| Apolipoprotein A1 (g/l)                                 | 1.54±0.27                                  | 1.50±0.27                                                      | .18                              | .057                               |
| Apolipoprotein B (g/l)                                  | 1.04±0.24                                  | 1.01±0.24                                                      | .51                              | .21                                |
| Lipoprotein A (nmol/l)                                  | 44.05±48.9                                 | 42.00±49.4                                                     | .99                              | .90                                |
| <b>ICD10 coded diagnoses</b>                            |                                            |                                                                |                                  |                                    |
| Overall liver disease (K70-K76)                         | 1.59                                       | 0.00                                                           | .27                              | .99                                |
| Alcoholic liver disease (K70)                           | 0.23                                       | 0.00                                                           | .67                              | .99                                |
| Toxic liver disease (K71)                               | 0.02                                       | 0.00                                                           | .90                              | .99                                |
| Hepatic failure (K72)                                   | 0.11                                       | 0.00                                                           | .76                              | .99                                |
| Chronic Hepatitis (K73)                                 | 0.03                                       | 0.00                                                           | .87                              | .99                                |
| Fibrosis and cirrhosis (K74)                            | 0.25                                       | 0.00                                                           | .65                              | .99                                |
| Inflammatory liver diseases (K75)                       | 0.25                                       | 0.00                                                           | .85                              | .99                                |
| NASH (K75.8)                                            | 0.07                                       | 0.00                                                           | .80                              | .99                                |
| Other liver diseases (K76)                              | 1.16                                       | 0.00                                                           | .33                              | .99                                |
| NAFLD (K76.0)                                           | 0.59                                       | 0.00                                                           | .49                              | .99                                |



Quantitative measures are expressed as means and standard deviations or as relative frequencies (%). All multivariable analyses were adjusted for age, sex, BMI, and PC1-4. \*(0=non carrier, 1=heterozygous, 2=homozygous). A FDR adjusted significance level of  $p \leq 0.03$  was used.

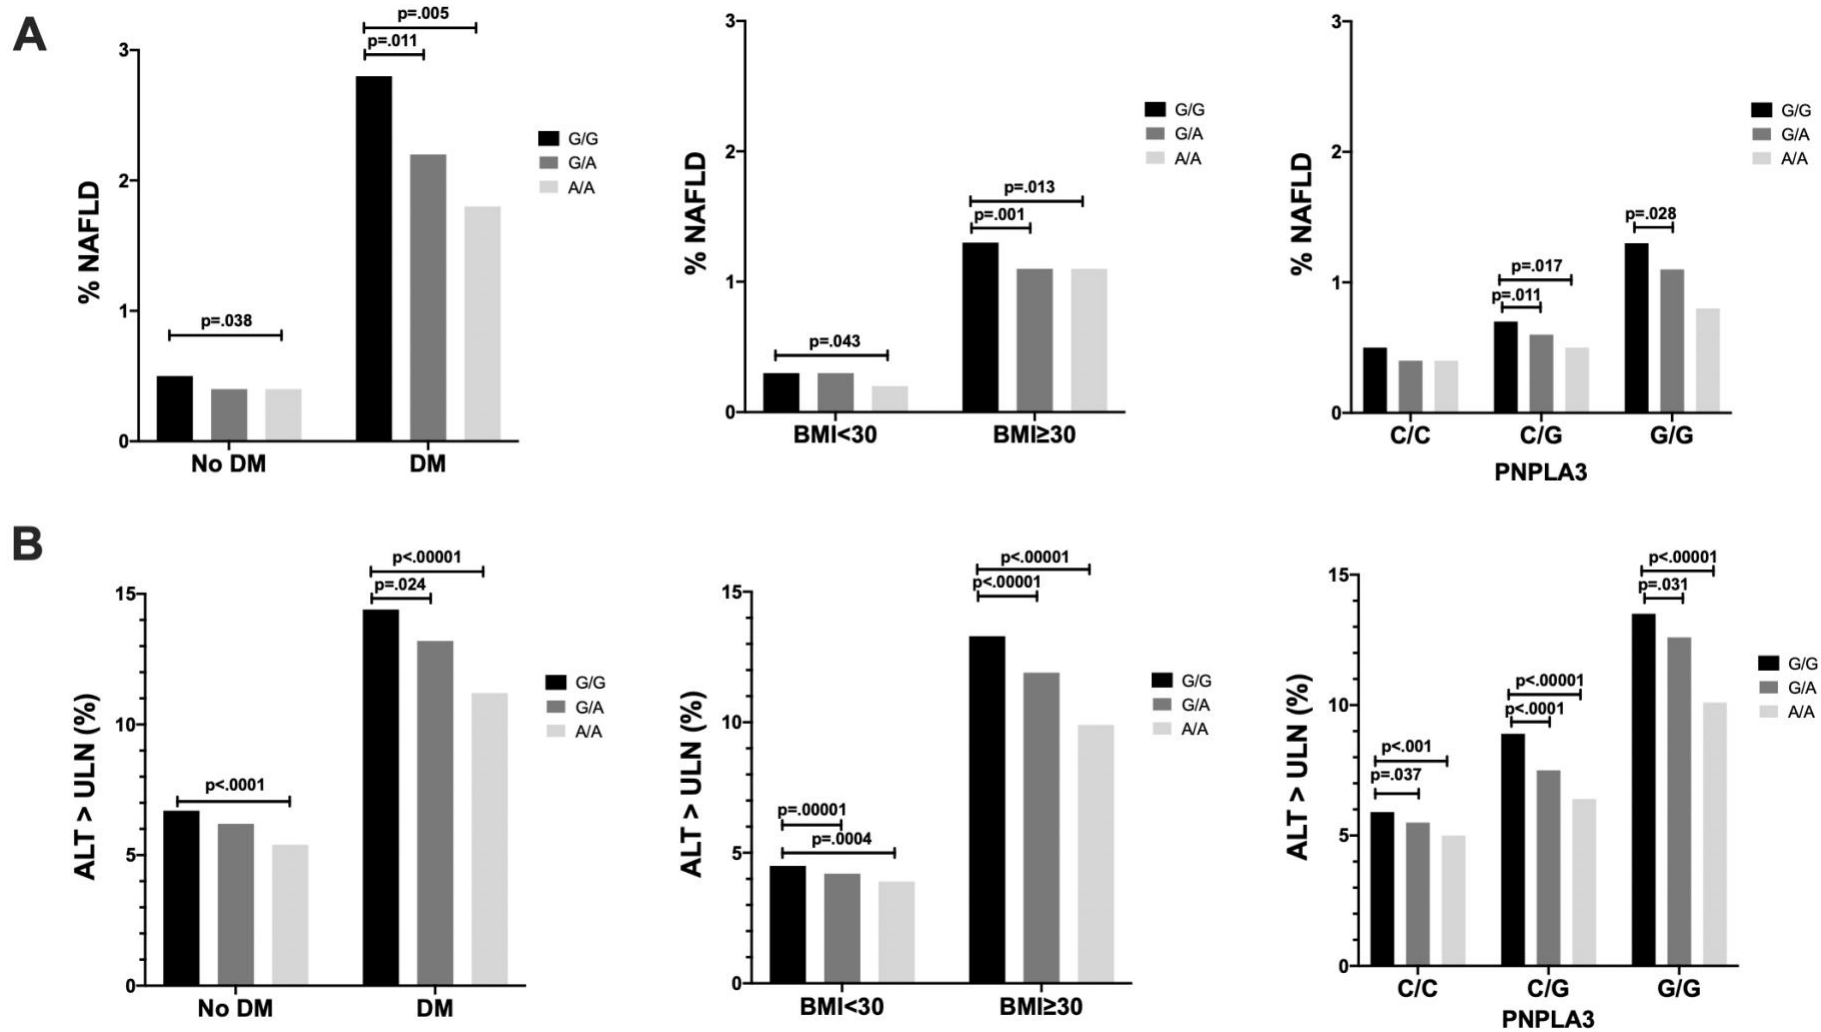

**Supplemental Figure 1: Barograph comparing A) the NAFLD percentage and B) elevated ALT serum levels in participants *MTARC1* rs2642438 homozygotes(A/A), heterozygotes(G/A) and non-carriers (G/G) with and without several important risk factors in the UKB, related to Figure 2.**

All multivariable analyses were adjusted for age, sex, BMI, and PC1-4.

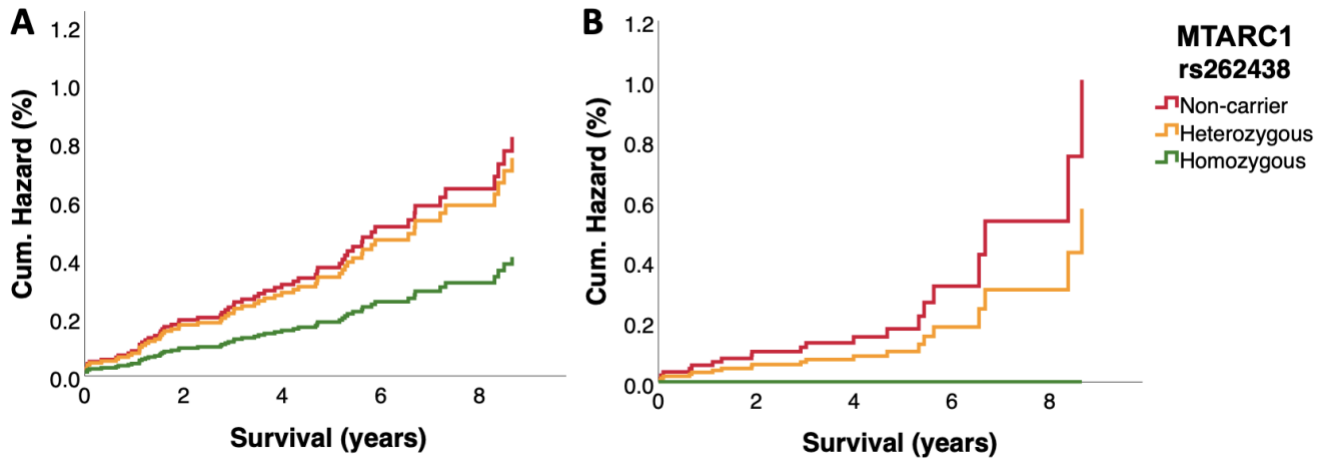

**Supplemental Figure 2: Prospective liver-related mortality as a function of *MTARC1* rs2642438 genotype in PMBB, related to Figure 3.**

(A) Liver-related mortality in the overall PMBB population as a function of *MTARC1* genotype, B) liver-related mortality as a function of *MTARC1* rs2642438 genotype in African-American participants in PMBB. Liver-related mortality comprised death due to liver diseases or hepatocellular carcinoma. Participants were followed prospectively from the time of study entry until death or end of follow-up. Hazard ratios were calculated by Cox regression, adjusted for age, sex, BMI and principal components of ancestry 1-4.

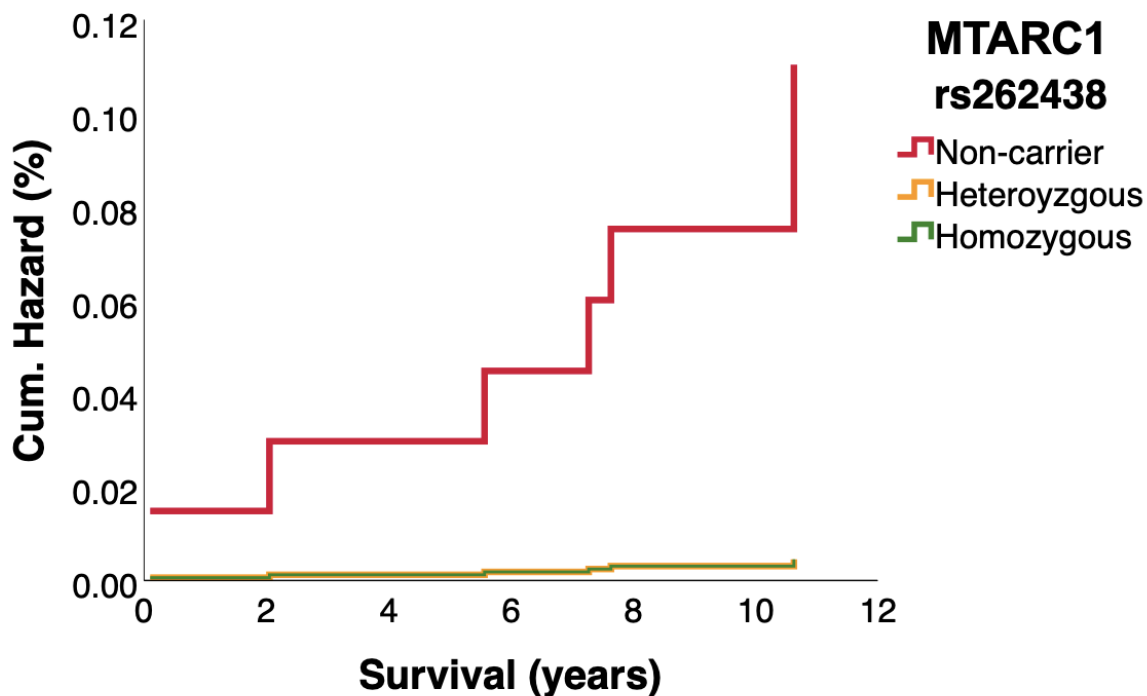

**Supplemental Figure 3: Prospective liver-related mortality as a function of *MTARC1* rs264238 genotype in Black British participants in the UKB, related to Figure 3.**

Liver-related mortality comprises death due to liver diseases or hepatocellular carcinoma. (A) Liver-related mortality as a function of *MTARC1* rs264238 genotype. Participants were followed prospectively from the time of study entry until death or end of follow-up. Hazard ratios were calculated by Cox regression, adjusted for age, sex, BMI and principal components of ancestry 1-4.

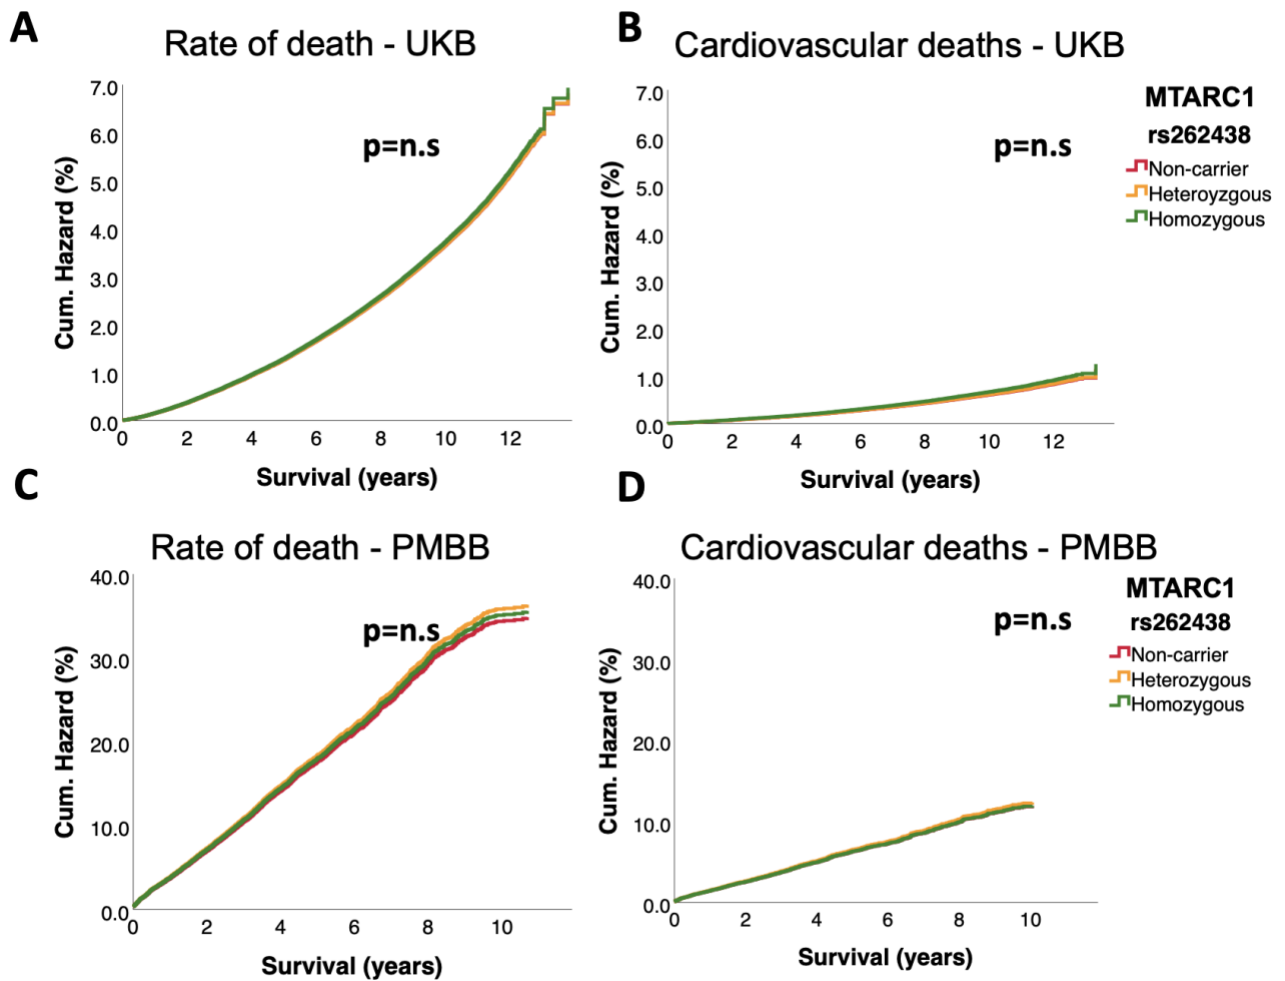

**Supplemental Figure 4: Overall and cardiovascular mortality in participants stratified by *MTARC1* rs262438 genotype in UKB (A,B) and PMBB (C,D), related to Figure 3.**

All analyses were adjusted for age, sex, BMI and principal components of ancestry 1-4. Parts of the survival curves overlap each other, so that only one line is visible.
